# Supplementary material for: Adsorption of sulfate ions from water by CaCl 2 -modified biochar derived from kelp
Source: Royal Society of Chemistry journal article supplement (doi:10.1039/d2su00136e), 2023-01-01
Supplement: d2su00136e1.pdf [file d2su00136e1.pdf]

## Supplementary materials

Table 7 Equilibrium parameters  $R_L$

| SO <sub>4</sub> <sup>2-</sup> concentration (g/L) | Temperature(K) |        |        |
|---------------------------------------------------|----------------|--------|--------|
|                                                   | 303.15         | 313.15 | 323.15 |
| 0.3                                               | 0.6079         | 0.6636 | 0.6418 |
| 0.5                                               | 0.0033         | 0.0030 | 0.0031 |
| 0.7                                               | 0.3034         | 0.3222 | 0.3150 |
| 0.9                                               | 0.0036         | 0.0034 | 0.0035 |
| 1.0                                               | 0.2151         | 0.2254 | 0.2215 |
| 1.2                                               | 0.0039         | 0.0037 | 0.0037 |
| 1.4                                               | 0.1562         | 0.1624 | 0.1601 |
| 1.6                                               | 0.0040         | 0.0038 | 0.0039 |
| 1.8                                               | 0.1223         | 0.1266 | 0.1250 |
| 2.0                                               | 0.0041         | 0.0039 | 0.0040 |
| 2.3                                               | 0.0965         | 0.0995 | 0.0984 |
| 2.6                                               | 0.0040         | 0.0039 | 0.0039 |
| 2.9                                               | 0.0799         | 0.0822 | 0.0813 |
